# Supplementary material
Source: PubMed Central journal article supplement (PMC3666798)
Supplement: JCM.00058-13_zjm999092421so1.pdf [file JCM.00058-13_zjm999092421so1.pdf]

Fig. S1

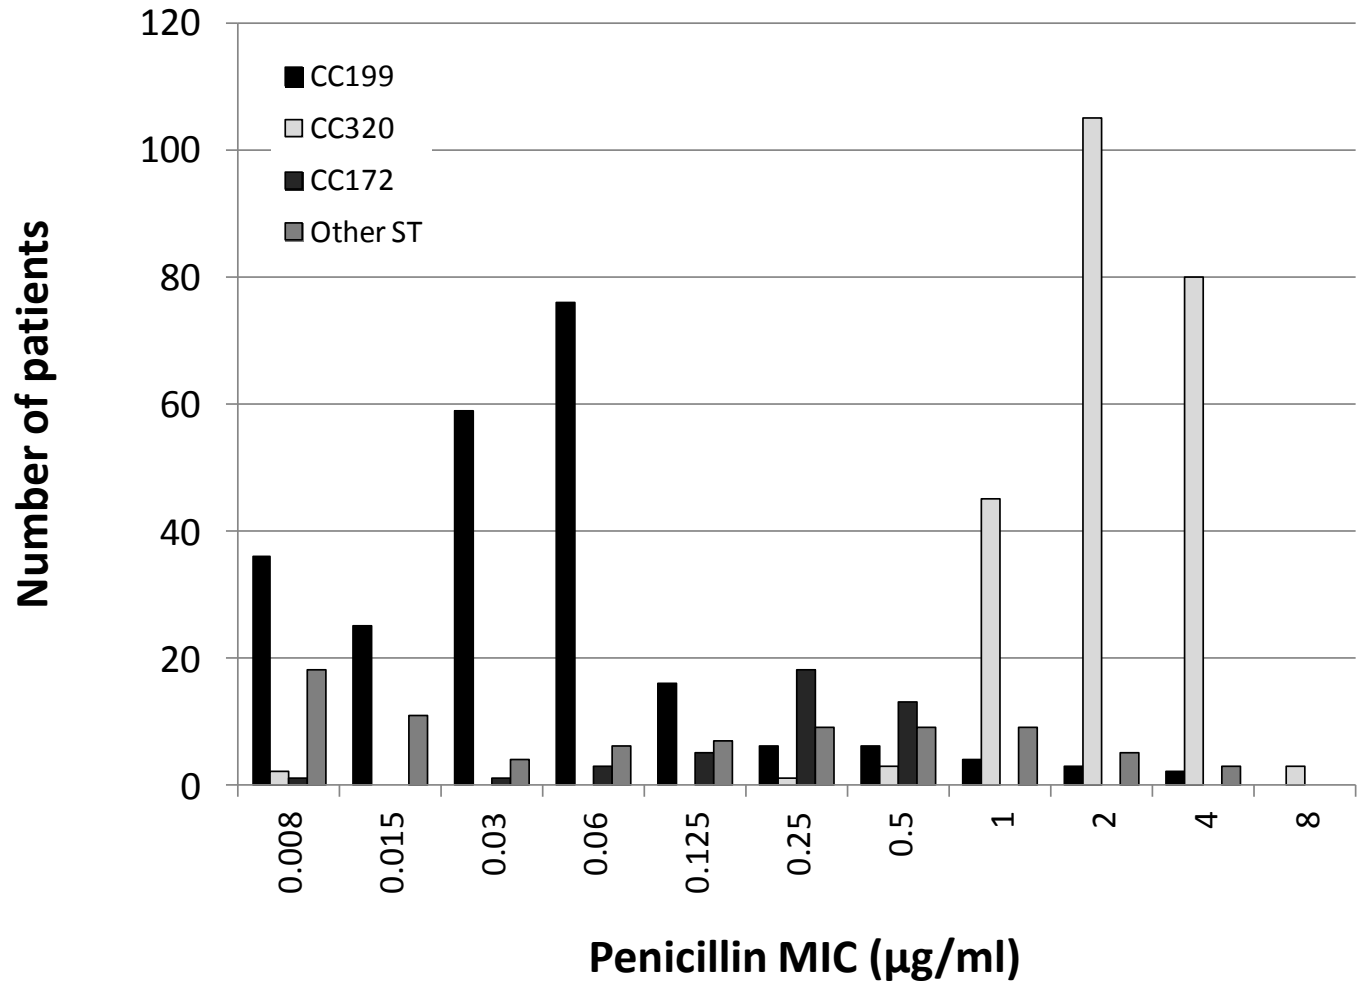

**Fig. S1.** Penicillin MIC distribution of serotype 19A isolates recovered from 8 children’s hospitals 1993-2011. The isolates were grouped by the most common clonal clusters CC199, CC320, CC172, and “other ST”.
