# Supplementary material
Source: PubMed Central journal article supplement (PMC3666798)
Supplement: JCM.00058-13_zjm999092421so2.pdf [file JCM.00058-13_zjm999092421so2.pdf]

Fig. S2

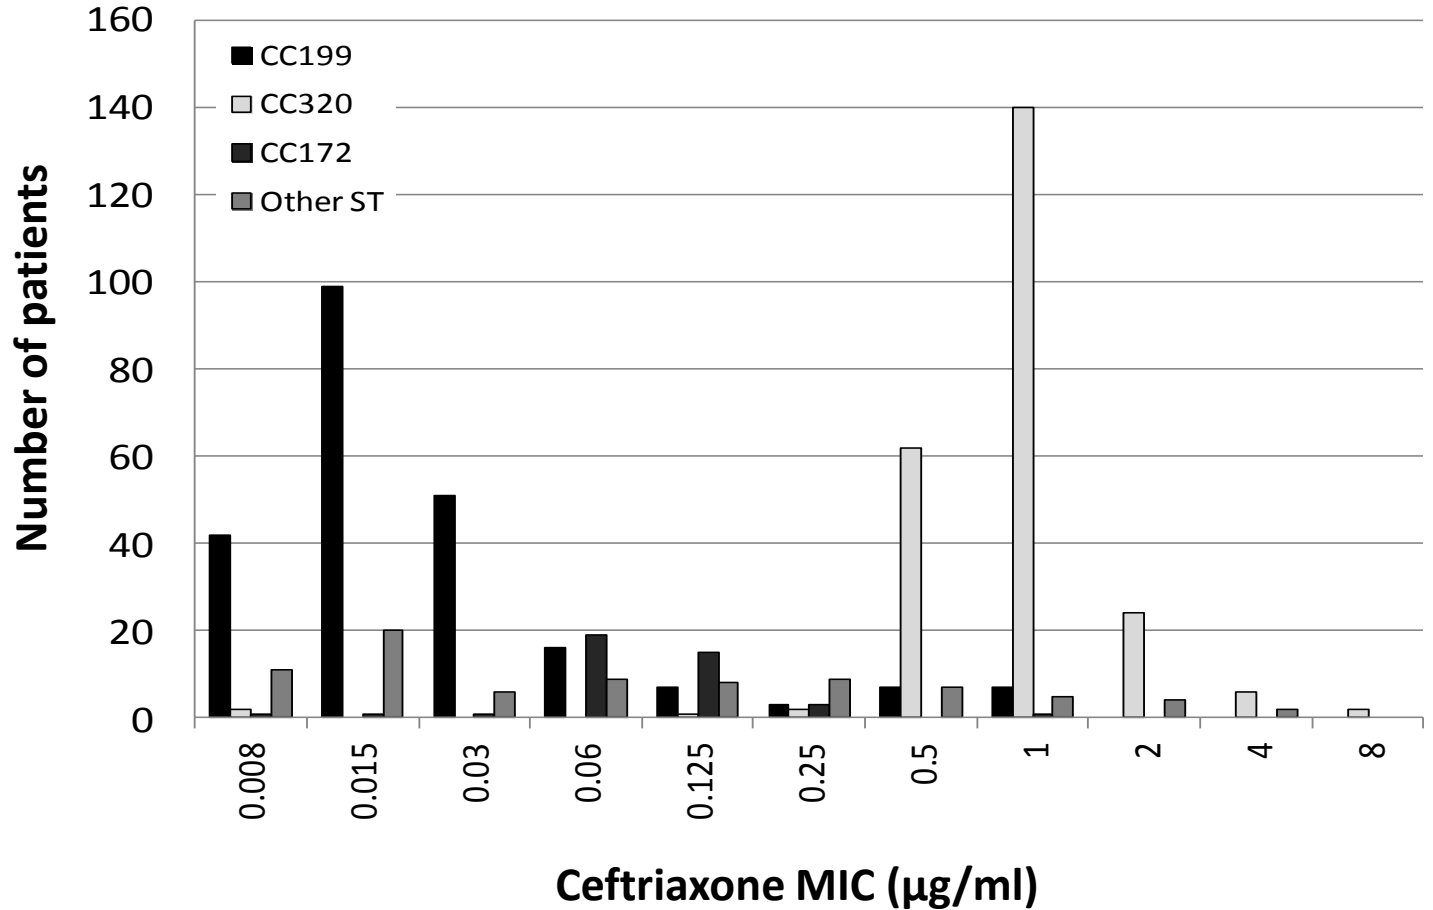

**Fig. S2.** Ceftriaxone MIC distribution of serotype19A isolates recovered from 8 children’s hospitals 1993-2011. The isolates were grouped by the most common clonal clusters CC199, CC320, CC172, and “other ST”.
